# Supplementary material for: Effect of Phenolic Extract from Red Beans (Phaseolus vulgaris L.) on T-2 Toxin-Induced Cytotoxicity in HepG2 Cells
Source: MDPI journal article supplement (doi:10.3390/foods11071033), 2022-04-02
Supplement: s1 [file s1]

Table S1. Total phenolic content (TPC) and antiradical activity (DPPH) of undiluted red bean extracts using different mixtures of MeOH:H<sub>2</sub>O. Values are reported as mean ± SD of independent experiments performed in triplicate.

| Mixture (v/v) | TPC                       | DPPH                           |
|---------------|---------------------------|--------------------------------|
|               | (mg/mL undiluted extract) | (mmol TE/mL undiluted extract) |
| 20:80         | 0.0171                    | 7.6 × 10 <sup>-4</sup>         |
| 70:30         | 0.0169                    | 8.1 × 10 <sup>-4</sup>         |
| 50:50         | 0.0179                    | 8.4 × 10 <sup>-4</sup>         |
| 30:70         | 0.0310                    | 1.37 × 10 <sup>-3</sup>        |
| 80:20         | 0.0252                    | 1.17 × 10 <sup>-3</sup>        |

TPC: total phenolic content; GAE: gallic acid equivalents; DPPH: antiradical activity; TE: Trolox equivalents

Table S2. Polyphenols content in undiluted red bean extracts. Results are expressed as mean  $\pm$  SD from three independent determinations.

| Compound                    | Content (mg/mL undiluted extract) |
|-----------------------------|-----------------------------------|
| Apigenin 7-O-glucoside      | <LOQ                              |
| Catechin                    | <LOQ                              |
| Chlorogenic acid            | $7.5 \times 10^{-6}$              |
| Cyanidin                    | $1.1 \times 10^{-4}$              |
| Cyanidin 3-glucoside        | <LOQ                              |
| Cyanidin 3,5-diglucoside    | $2.8 \times 10^{-5}$              |
| Daidzein                    | <LOQ                              |
| Delphinidin                 | $5.1 \times 10^{-4}$              |
| Delphinidin 3,5-diglucoside | $3.5 \times 10^{-5}$              |
| Ellagic acid                | $7.5 \times 10^{-6}$              |
| Epicatechin                 | $5.4 \times 10^{-4}$              |
| Genistin                    | <LOQ                              |
| Isoquercetrin               | $1.7 \times 10^{-4}$              |
| kaempferol 3-O-glucoside    | $1.3 \times 10^{-4}$              |
| Luteolin                    | $3.5 \times 10^{-6}$              |
| Naringenin                  | <LOQ                              |
| Naringin                    | <LOQ                              |
| <i>p</i> -coumaric acid     | $3.2 \times 10^{-4}$              |
| Protocatechiuc acid         | $8.8 \times 10^{-5}$              |
| Quercetin                   | $4.9 \times 10^{-5}$              |
| Rosmarinic acid             | <LOQ                              |
| Rutin                       | $7.9 \times 10^{-5}$              |
